# Supplementary material for: Association Between Antidiabetic Medications and Prostate-Specific Antigen Levels and Biopsy Results
Source: PubMed Central journal article supplement (PMC6865613; doi:10.1001/jamanetworkopen.2019.14689), 2019-11-06
Supplement: jamanetwopen-2-e1914689-s001.pdf [file jamanetwopen-2-e1914689-s001.pdf]

## Supplementary Online Content

Beckmann K, Crawley D, Nordström T, et al. Association between antidiabetic medications and prostate-specific antigen levels and biopsy results. *JAMA Netw Open*. 2019;2(11):e1914689. doi:10.1001/jamanetworkopen.2019.14689

**eTable 1.** Cohort Characteristics—Studying the Effects of Antidiabetic Medication on PSA Levels

**eTable 2.** Full Model Results: Percent Difference in Follow-up PSA Levels Following First Exposure to Anti-diabetes Medications

**eTable 3.** PSA Testing and Prostate Biopsy Rates Among Men Aged 40-79 Years Living in Stockholm County 2006-2015

**eTable 4.** Full Model Results: Zero-Inflated Poisson Regression Assessing Rates of PSA Testing and Prostate Biopsy, Among Men Aged 40-79 Years Living in Stockholm County (2006-2015)

**eTable 5.** Characteristics of Men Within an Elevated PSA Test Result According to Whether They Underwent a Prostate Biopsy Within 12 Months of the Relevant PSA Test

**eTable 6.** Full Model Results: Likelihood of Prostate Biopsy Within 12 Months of PSA Test Result of  $\geq 3.0$  and  $\geq 4.0$  ng/mL, Among Men Aged 40-79 Years in Stockholm County, Tested 2006-2014

**eTable 7.** Characteristics of Study Population Examining the Effects of Antidiabetic Medications on Prostate Cancer Detection at Biopsy

**eTable 8.** Full Models Results: Odds Ratios for PCa Detected at Biopsy

This supplementary material has been provided by the authors to give readers additional information about their work.

**eTable 1. Cohort characteristics - studying the effects of antidiabetic medication on PSA levels**

| Factors            |           | Any medication |               | Metformin     |               | Sulfonylurea  |               | Insulin       |               |
|--------------------|-----------|----------------|---------------|---------------|---------------|---------------|---------------|---------------|---------------|
|                    |           | Not exposed    | Exposed       | Not exposed   | Exposed       | Not exposed   | Exposed       | Not exposed   | Exposed       |
| Total no.          |           | 22097          | 4424          | 22899         | 4583          | 5524          | 1104          | 4872          | 978           |
|                    |           | median (IQR)   | median (IQR)  | median (IQR)  | median (IQR)  | median (IQR)  | median (IQR)  | median (IQR)  | median (IQR)  |
| Follow-up PSA      | ng/mL     | 1.6 (0.8-3.4)  | 1.3 (0.7-2.7) | 1.6 (0.8-3.5) | 1.3 (0.7-2.7) | 1.6 (0.8-3.2) | 1.2 (0.6-2.4) | 1.7 (0.8-3.5) | 1.2 (0.7-2.4) |
| Baseline PSA       | ng/mL     | 1.6 (0.8-3.2)  | 1.2 (0.7-2.5) | 1.6 (0.8-3.3) | 1.2 (0.7-2.5) | 1.6 (0.8-3.4) | 1.2 (0.7-2.7) | 1.6 (0.8-3.3) | 1.2 (0.6-2.4) |
| Time Interval      | months    | 12 (6-18)      | 13 (9-21)     | 12 (6-18)     | 13 (8-21)     | 12 (6-18)     | 14 (10-22)    | 12 (6-17)     | 15 (10-22)    |
|                    |           | No. %          | No. %         | No. %         | No. %         | No. %         | No. %         | No. %         | No. %         |
| Age (years)        | 40-49     | 904 (4)        | 179 (4)       | 869 (4)       | 173 (4)       | 222 (4)       | 21 (4)        | 213 (4)       | 40 (4)        |
|                    | 50-59     | 5507 (25)      | 1101 (25)     | 5682 (25)     | 1129 (25)     | 1310 (24)     | 263 (24)      | 1084 (22)     | 218 (22)      |
|                    | 60-69     | 10799 (49)     | 2150 (49)     | 11086 (48)    | 2214 (48)     | 2694 (49)     | 538 (49)      | 2359 (48)     | 473 (48)      |
|                    | 70-79     | 4887 (22)      | 994 (22)      | 5262 (23)     | 1067 (23)     | 1293 (24)     | 262 (24)      | 1216 (25)     | 247 (25)      |
| CCI                | 0         | 18559 (84)     | 3348 (76)     | 19181 (84)    | 3505 (76)     | 4613 (84)     | 827 (75)      | 4018 (82)     | 613 (63)      |
|                    | 1         | 1759 (8)       | 523 (12)      | 1850 (8)      | 544 (12)      | 428 (8)       | 136 (12)      | 436 (9)       | 142 (15)      |
|                    | 2+        | 1779 (8)       | 553 (13)      | 1868 (8)      | 534 (12)      | 483 (9)       | 141 (13)      | 418 (9)       | 22 (23)       |
| Married            | No        | 7468 (34)      | 1737 (39)     | 7719 (34)     | 1803 (39)     | 1893 (34)     | 448 (41)      | 1662 (34)     | 413 (42)      |
|                    | Yes       | 14629 (66)     | 2687 (61)     | 15180 (66)    | 2780 (61)     | 3631 (66)     | 656 (59)      | 3210 (66)     | 565 (58)      |
| Education          | Low       | 8180 (37)      | 2082 (47)     | 8465 (37)     | 2185 (48)     | 2091 (38)     | 540 (49)      | 1790 (37)     | 481 (49)      |
|                    | Medium    | 7562 (34)      | 1387 (31)     | 7861 (34)     | 1442 (32)     | 1895 (34)     | 337 (31)      | 1612 (33)     | 304 (31)      |
|                    | High      | 6158 (28)      | 892 (20)      | 6368 (28)     | 889 (19)      | 1484 (27)     | 211 (19)      | 1417 (29)     | 177 (18)      |
|                    | Missing   | 197 (1)        | 63 (1)        | 205 (1)       | 67 (1)        | 54 (1)        | 16 (1)        | 53 (1)        | 16 (2)        |
| Family history Pca | No        | 19100 (86)     | 3968 (90)     | 19782 (86)    | 4106 (90)     | 4740 (86)     | 1014 (92)     | 4175 (86)     | 890 (91)      |
|                    | Yes       | 2997 (14)      | 456 (10)      | 3117 (14)     | 477 (10)      | 784 (14)      | 90 (8)        | 697 (14)      | 88 (9)        |
| Prior medications  | Metformin | -              | 3918 (89)     | -             | 4583 (100)    | -             | 785 (71)      | -             | 713 (73)      |
|                    | SU        | -              | 595 (13)      | -             | 807 (17)      | -             | 1104 (100)    | -             | 388 (40)      |
|                    | Insulin   | -              | 423 (10)      | -             | 470 (10)      | -             | 127 (12)      | -             | 978 (100)     |

CCI: Charlson Comorbidity Index; IQR: interquartile range; PSA: prostate specific antigen

**eTable 2. Full model results: percent difference in follow-up PSA levels following first exposure to anti-diabetes medications**

| Factors:               | First antidiabetic drug (any)<br>No. exposed=4424 <sup>a</sup> |        |      |       | Metformin<br>No. exposed=4583 <sup>a</sup> |        |      |       | Sulfonylurea<br>No. exposed=1104 <sup>a</sup> |        |      |       | Insulin<br>No. exposed=987 <sup>a</sup> |        |      |       |
|------------------------|----------------------------------------------------------------|--------|------|-------|--------------------------------------------|--------|------|-------|-----------------------------------------------|--------|------|-------|-----------------------------------------|--------|------|-------|
|                        | % diff                                                         | 95% CI |      | p     | % diff                                     | 95% CI |      | p     | % diff                                        | 95% CI |      | p     | % diff                                  | 95% CI |      | p     |
| <b>Exposed to drug</b> | -0.9                                                           | -2.3   | 0.5  | 0.210 | -0.7                                       | -2.1   | 0.8  | 0.383 | 4.1                                           | -0.8   | 9.1  | 0.101 | -6.5                                    | -13.8  | 0.8  | 0.082 |
| % change baseline PSA  | 0.93                                                           | 0.92   | 0.94 | 0.000 | 0.93                                       | 0.92   | 0.94 | 0.000 | 0.93                                          | 0.92   | 0.95 | 0.000 | 0.91                                    | 0.89   | 0.93 | 0.000 |
| Interval (months)      | 4.9                                                            | 4.0    | 5.6  | 0.000 | 5.1                                        | 4.3    | 5.8  | 0.000 | 4.0                                           | 2.6    | 5.3  | 0.000 | 4.6                                     | 3.0    | 6.2  | 0.000 |
| CCI=0                  | ref                                                            | -      | -    | -     | ref                                        | -      | -    | -     | ref                                           | -      | -    | -     | ref                                     | -      | -    | -     |
| 1                      | 0.0                                                            | -1.9   | 1.8  | 0.993 | 0.2                                        | -1.6   | 2.0  | 0.862 | -1.1                                          | -4.7   | 2.6  | 0.557 | 1.1                                     | -3.4   | 5.8  | 0.637 |
| 2+                     | -7.9                                                           | -10.6  | -5.1 | 0.000 | -9.1                                       | -11.9  | -6.1 | 0.000 | -9.0                                          | -14.0  | -3.8 | 0.001 | -6.8                                    | -12.6  | -0.6 | 0.031 |
| Year of follow-up test | -0.3                                                           | -0.5   | -0.1 | 0.014 | -0.3                                       | -0.5   | -0.1 | 0.002 | -0.2                                          | -0.7   | 0.2  | 0.239 | -0.1                                    | -0.6   | 0.4  | 0.630 |
| Married                | -0.7                                                           | -1.8   | 0.5  | 0.256 | -0.9                                       | -1.9   | 0.3  | 0.130 | 1.1                                           | -1.1   | 3.4  | 0.334 | -0.2                                    | -2.7   | 2.5  | 0.904 |
| Education: Low         | ref                                                            | -      | -    | -     | ref                                        | -      | -    | -     | ref                                           | -      | -    | -     | ref                                     | -      | -    | -     |
| Medium                 | 0.4                                                            | -0.9   | 1.6  | 0.556 | 0.4                                        | -0.8   | 1.6  | 0.522 | -0.1                                          | -2.4   | 2.2  | 0.912 | -1.3                                    | -4.1   | 1.7  | 0.403 |
| High                   | 0.6                                                            | -0.8   | 1.9  | 0.434 | 0.6                                        | -0.7   | 2.0  | 0.369 | 0.3                                           | -2.5   | 3.2  | 0.813 | -0.6                                    | -3.3   | 2.2  | 0.691 |
| Family history of PCa  | -0.2                                                           | -1.9   | 1.5  | 0.918 | 0.2                                        | -1.5   | 1.9  | 0.820 | 1.0                                           | -1.9   | 4.1  | 0.496 | 1.5                                     | -2.0   | 5.2  | 0.392 |
| Prior exposure to:     |                                                                |        |      |       |                                            |        |      |       |                                               |        |      |       |                                         |        |      |       |
| Metformin              | -                                                              | -      | -    | -     | -                                          | -      | -    | -     | -6.3                                          | -11.6  | -0.7 | 0.029 | 3.2                                     | -4.8   | 11.8 | 0.442 |
| Sulfonylurea           | -                                                              | -      | -    | -     | 0.1                                        | -4.0   | 4.3  | 0.975 | -                                             | -      | -    | -     | 1.6                                     | -4.8   | 8.4  | 0.636 |
| Insulin                | -                                                              | -      | -    | -     | -1.9                                       | -5.2   | 1.6  | 0.283 | 0.5                                           | -6.9   | 8.5  | 0.895 | -                                       | -      | -    | -     |

CI: confidence interval; PCa: Prostate cancer; PSA: prostate specific antigen; ref: reference group.

% Diff: per cent difference in PSA - Derived from multivariable linear regression for (log-transformed) PSA at follow-up

<sup>a</sup> Comparison groups consisted of men not previously exposed to the specific class of antidiabetic medication age matched at follow-up PSA test (5:1)

**eTable 3. PSA testing and prostate biopsy rates among men aged 40-79 years living in Stockholm County 2006-2015**

|                                     |        | No. (%) persons | Follow-up person years <sup>a</sup> | Avg. annual rate PSA test (per 1000) | Avg. annual rate biopsy (per 1000) |
|-------------------------------------|--------|-----------------|-------------------------------------|--------------------------------------|------------------------------------|
| Total (persons)                     |        | 564,666 (100)   | 4,252,532                           | 223                                  | 8.7                                |
| Age (years) <sup>b</sup>            | 40-49  | 168,372 (38)    | 1,627,514                           | 65                                   | 0.5                                |
|                                     | 50-59  | 119,683 (27)    | 1,181,781                           | 225                                  | 7.2                                |
|                                     | 60-69  | 100,909 (23)    | 962,944                             | 386                                  | 21.0                               |
|                                     | 70-79  | 48,689 (11)     | 472,494                             | 443                                  | 17.0                               |
| Education level                     | Low    | 98,803 (18)     | 756,608                             | 224                                  | 8.8                                |
|                                     | Medium | 228,219 (41)    | 1,749,589                           | 219                                  | 8.6                                |
|                                     | High   | 227,261 (41)    | 1,693,889                           | 227                                  | 9.2                                |
| Married                             | No     | 245,464 (47)    | 1,949,796                           | 178                                  | 6.8                                |
|                                     | Yes    | 299,202 (53)    | 2,302,736                           | 261                                  | 10.5                               |
| Family history PCa                  | No     | 516,732 (92)    | 3,865,063                           | 215                                  | 8.2                                |
|                                     | Yes    | 47,934 (8)      | 387,469                             | 304                                  | 15.3                               |
| Metformin use                       | Yes    | 35,373 (6)      | 147,047                             | 285                                  | 8.7                                |
| Sulfonylurea use                    | Yes    | 18,411 (3)      | 68,501                              | 293                                  | 8.9                                |
| Insulin use                         | Yes    | 24,055 (4)      | 101,548                             | 209                                  | 6.5                                |
| Any antidiabetic drugs <sup>b</sup> | Yes    | 45,230 (8)      | 320,139                             | 212                                  | 8.4                                |

PCa: prostate cancer; PSA: prostate specific antigen

<sup>a</sup> includes all follow-up time while aged 40-79yrs between year 2006 to 2015

<sup>b</sup> age distribution in 2012

**eTable 4. Full Model Results: Zero-inflated Poisson regression assessing rates of PSA testing and prostate biopsy, among men aged 40-79 years living in Stockholm County (2006-2015).**

| Factors                                       | PSA testing |              | Prostate Biopsy |             |
|-----------------------------------------------|-------------|--------------|-----------------|-------------|
|                                               | Rate ratio  | 99% CI       | Rate ratio      | 99% CI      |
| Age (years)                                   | 1.015       | 1.014-1.015  | 0.922           | 0.918-0.929 |
| Calendar year                                 | 0.996       | 0.995- 0.997 | 1.004           | 0.995-1.013 |
| Education level (reference: low)              | 1.00        | -            | 1.00            | -           |
| Medium                                        | 1.19        | 1.15-1.17    | 1.14            | 1.10-1.19   |
| High                                          | 1.33        | 1.31-1.34    | 1.23            | 1.16-1.30   |
| Married (reference: Not married)              | 1.15        | 1.18-1.20    | 1.19            | 1.14-1.28   |
| Family hist. of PCa (reference: None)         | 1.20        | 1.18-1.21    | 1.27            | 1.19-1.36   |
| Metformin use <sup>a</sup>                    | 1.07        | 1.06-1.09    | 0.76            | 0.70-0.83   |
| Sulfonylurea use <sup>a</sup>                 | 1.06        | 1.03-1.08    | 0.93            | 0.83-1.04   |
| Insulin use <sup>a</sup>                      | 0.79        | 0.77-0.81    | 0.67            | 0.60-0.75   |
| Ever any antidiabetic medication <sup>b</sup> | 0.93        | 0.92-0.94    | 0.59            | 0.55-0.62   |

CI: confidence interval; PCa: Prostate cancer; PSA: prostate specific antigen

Rate Ratios derived from Zero-inflated Poisson regression models adjusted for all covariates listed simultaneously,

<sup>a</sup> Time split at first prescription for specific class of antidiabetic drug, with simultaneous adjustment for prior exposure to other antidiabetic medication (separate models)

<sup>b</sup> 'ever prescribed antidiabetic medications' was defined as any exposure to any class of antidiabetic medication during follow-up derived. Analysed in a separate model with adjustment for the same covariates except other diabetes medications.

**eTable 5. Characteristics of men within an elevated PSA test result according to whether they underwent a prostate biopsy within 12 months of the relevant PSA test**

| PSA result:      | PSA $\geq$ 3ng/mL |             | PSA $\geq$ 4ng/mL |             |
|------------------|-------------------|-------------|-------------------|-------------|
|                  | No biopsy <12m    | Biopsy <12m | No biopsy <12m    | Biopsy <12m |
|                  | No. (%)           | No. (%)     | No. (%)           | No. (%)     |
| Total            | 34232 (64)        | 19125 (36)  | 22229 (57)        | 16056 (43)  |
| Age group        |                   |             |                   |             |
| 40-49            | 1173 (3)          | 388 (2)     | 617 (3)           | 310 (2)     |
| 50-59            | 5218 (15)         | 4256 (22)   | 2897 (13)         | 3408 (21)   |
| 60-69            | 13079 (38)        | 10429 (54)  | 8127 (37)         | 8914 (54)   |
| 70-79yrs         | 14762 (43)        | 4052 (21)   | 10588 (47)        | 3858 (23)   |
| Education level  |                   |             |                   |             |
| low              | 7795 (23)         | 3484 (18)   | 5360 (24)         | 3110 (19)   |
| medium           | 1366 (40)         | 7728 (40)   | 8836 (40)         | 6682 (41)   |
| high             | 12278 (39)        | 7793 (41)   | 7812 (35)         | 6587 (40)   |
| missing          | 493 (1)           | 120 (1)     | 331 (1)           | 111 (1)     |
| CCI              |                   |             |                   |             |
| 0                | 26202 (77)        | 16627 (87)  | 16637 (75)        | 14245 (86)  |
| 1                | 3668 (11)         | 1397 (7)    | 2489 (11)         | 1242 (8)    |
| 2                | 1526 (4)          | 472 (2)     | 1081 (5)          | 422 (3)     |
| 3+               | 2836 (8)          | 629 (3)     | 2022 (9)          | 581 (4)     |
| Married          |                   |             |                   |             |
| No               | 13585 (40)        | 6847 (36)   | 8827 (40)         | 5929 (36)   |
| Yes              | 20647 (60)        | 12278 (64)  | 13402 (60)        | 10561 (64)  |
| Family hist. PCa |                   |             |                   |             |
| No               | 30660 (90)        | 15954 (83)  | 19906 (90)        | 13797 (84)  |
| yes              | 3572 (10)         | 3171 (17)   | 2232 (10)         | 2693 (16)   |
| Metformin        |                   |             |                   |             |
| No               | 31481 (92)        | 18029 (94)  | 20409 (92)        | 15543 (94)  |
| Yes              | 2751 (8)          | 1096 (6)    | 1820 (8)          | 947 (6)     |
| Sulfonylurea     |                   |             |                   |             |
| No               | 32740 (96)        | 18640 (97)  | 21216 (95)        | 16061 (97)  |
| Yes              | 1492 (4)          | 485 (3)     | 1013 (5)          | 429 (3)     |
| Insulin          |                   |             |                   |             |
| No               | 32725 (96)        | 18622 (97)  | 21225 (95)        | 16056 (97)  |
| Yes              | 1507 (4)          | 503 (3)     | 1004 (5)          | 434 (3)     |

CCI: Charlson Comorbidity Index; PCa: prostate cancer; PSA: prostate specific antigen

Index PSA = highest PSA value during follow-up

**eTable 6. Full Model results: Likelihood of prostate biopsy within 12 months of PSA test result of  $\geq 3.0$  and  $\geq 4.0$  ng/mL, among men aged 40-79 years in Stockholm County, tested 2006-2014**

| Factors                          | Total PSA $\geq 3.0$ ng/mL<br>n=53,357 |           | Total PSA $\geq 4.0$ ng/mL<br>n=38719 |           |
|----------------------------------|----------------------------------------|-----------|---------------------------------------|-----------|
|                                  | Odds ratio                             | 95% CI    | Odds ratio                            | 95% CI    |
| Prior exposure to:               |                                        |           |                                       |           |
| Metformin                        | 0.87                                   | 0.80-0.96 | 0.87                                  | 0.79-0.96 |
| Sulfonylurea                     | 0.88                                   | 0.78-1.00 | 0.88                                  | 0.76-1.01 |
| Insulin                          | 0.83                                   | 0.74-0.93 | 0.81                                  | 0.71-0.92 |
| Age 40-49                        | 0.39                                   | 0.35-0.44 | 0.43                                  | 0.37-0.49 |
| 50-59                            | 0.96                                   | 0.91-1.01 | 1.00                                  | 0.95-1.07 |
| 60-69 (reference)                | 1.00                                   | -         | -                                     | -         |
| 70-79yrs                         | 0.39                                   | 0.37-0.41 | 0.37                                  | 0.36-0.39 |
| Education (reference: Low)       | 1.00                                   | -         | 1.00                                  | -         |
| medium                           | 1.12                                   | 1.06-1.17 | 1.12                                  | 1.06-1.19 |
| high                             | 1.14                                   | 1.08-1.20 | 1.13                                  | 1.07-1.20 |
| Married (reference: not married) | 1.18                                   | 1.14-1.17 | 1.18                                  | 1.13-1.23 |
| Family history of PCa            | 1.51                                   | 1.43-1.60 | 1.45                                  | 1.37-1.55 |
| CCI (reference: 0)               | 1.00                                   | -         | -                                     | -         |
| 1                                | 0.72                                   | 0.67-0.77 | 0.70                                  | 0.65-0.76 |
| 2                                | 0.59                                   | 0.54-0.67 | 0.57                                  | 0.50-0.63 |
| 3+                               | 0.49                                   | 0.44-0.53 | 0.47                                  | 0.42-0.52 |
|                                  |                                        |           |                                       |           |

Odd ratio derived from multivariable logistic regression model of biopsy procedure within 12 months of elevated PSA result, adjusted for age group (10yr bands), year of test, education, marital status, family history of PCa, Charlson comorbidity score (0,1,2,3+).

CI: confidence interval; PCa: Prostate cancer; PSA: prostate specific antigen

Index PSA = highest PSA value during follow-up if more than 1 test result over the cut-off

**eTable 7. Characteristics of study population examining the effects of antidiabetic medications on prostate cancer detection at biopsy**

| Characteristics           |                    | No cancer present | Cancer present |
|---------------------------|--------------------|-------------------|----------------|
| Total                     | No. %              | 19060 (59)        | 13063 (41)     |
| Age at first biopsy       | Mean years (SD)    | 64 (7)            | 66 (7)         |
| Trigger PSA               | Median ng/mL (IQR) | 4.9 (3.4-7.3)     | 6.4 (4.3-11)   |
|                           |                    | No. %             | No. %          |
| Civil status              | Not married        | 6735 (35)         | 4679 (36)      |
|                           | Married            | 12325 (65)        | 8384 (64)      |
| Education level           | Low                | 3326 (17)         | 2527 (19)      |
|                           | Medium             | 7503 (39)         | 5329 (41)      |
|                           | High               | 8086 (42)         | 5083 (39)      |
|                           | missing            | 145 (1)           | 124 (1)        |
| Family history of PCa     | No                 | 16484 (86)        | 10496 (80)     |
|                           | Yes                | 2576 (14)         | 1295 (10)      |
| CCI score at first biopsy | 0                  | 16586 (87)        | 10901 (83)     |
|                           | 1                  | 1346 (7)          | 1088 (8)       |
|                           | 2                  | 526(3)            | 446 (3)        |
|                           | 3+                 | 602 (3)           | 628 (5)        |
| Prior exposure to:        | Metformin          | 1113 (5.8)        | 861 (6.6)      |
|                           | Sulfonylurea       | 471 (2.5)         | 407 (3.1)      |
|                           | Insulin            | 499 (2.6)         | 401 (3.1)      |

CCI: Charlson Comorbidity Index; IQR: interquartile range; PCa: Prostate cancer; PSA: prostate specific antigen; SD standard deviation



**eTable 8. Full models results: Odds ratios for PCa detected at biopsy**

| Factors                                 | First prostate biopsy<br>n=30,821 |           | All biopsies pre-diagnosis <sup>a</sup><br>n=37,769 |           |
|-----------------------------------------|-----------------------------------|-----------|-----------------------------------------------------|-----------|
|                                         | OR                                | 95% CI    | OR                                                  | 95% CI    |
| <b>Age at biopsy (years)</b>            | 1.02                              | 1.02-1.03 | 1.03                                                | 1.02-1.03 |
| <b>Log PSA</b>                          | 1.98                              | 1.92-2.05 | 1.75                                                | 1.70-1.80 |
| <b>Education level</b>                  |                                   |           |                                                     |           |
| Low                                     | 1.00                              | reference | 1.00                                                | reference |
| Medium                                  | 1.06                              | 0.98-1.13 | 1.03                                                | 0.96-1.10 |
| High                                    | 0.98                              | 0.91-1.05 | 0.96                                                | 0.90-1.02 |
| <b>Married</b>                          |                                   |           |                                                     |           |
| No                                      | 1.00                              | reference | 1.00                                                | reference |
| Yes                                     | 1.00                              | 0.95-1.05 | 0.99                                                | 0.94-1.04 |
| <b>Family history of PCa</b>            |                                   |           |                                                     |           |
| No                                      | 1.00                              | reference | 1.00                                                | reference |
| Yes                                     | 1.73                              | 1.62-1.85 | 1.67                                                | 1.58-1.80 |
| <b>Comorbidity CCI score</b>            |                                   |           |                                                     |           |
| 0                                       | 1.00                              | reference | 1.00                                                | reference |
| 1                                       | 1.09                              | 1.00-1.20 | 1.15                                                | 1.05-1.25 |
| 2                                       | 1.07                              | 0.93-1.24 | 1.10                                                | 0.96-1.27 |
| 3+                                      | 1.28                              | 1.13-1.46 | 1.32                                                | 1.17-1.49 |
| <b>Metformin use prior to biopsy</b>    | 1.03                              | 0.92-1.16 | 1.03                                                | 0.92-1.15 |
| <b>Sulfonylurea use prior to biopsy</b> | 1.10                              | 0.93-1.30 | 1.14                                                | 0.97-1.34 |
| <b>Insulin use prior to biopsy</b>      | 0.96                              | 0.82-1.13 | 0.98                                                | 0.84-1.14 |
|                                         |                                   |           |                                                     |           |

CCI: Charlson comorbidity index; CI: confidence interval; PCa: Prostate cancer; PSA: prostate specific antigen.

Multivariable logistic regression simultaneously adjusted for age at biopsy, log (trigger PSA), CCI, education level, civil status, family history of PCa, and any prior exposure to other diabetes medications.

<sup>a</sup>Robust estimates accounting for non-independence between men who had undergone more than 1 prostate biopsy.
